# Supplementary material for: Adenovirus expressing dual c-Met-specific shRNA exhibits potent antitumor effect through autophagic cell death accompanied by senescence-like phenotypes in glioblastoma cells
Source: PubMed Central journal article supplement (PMC4414172; doi:10.18632/oncotarget.3018), 2015-02-17
Supplement: oncotarget-06-4051-s001.pdf [file oncotarget-06-4051-s001.pdf]

## SUPPLEMENTARY FIGURES AND TABLES

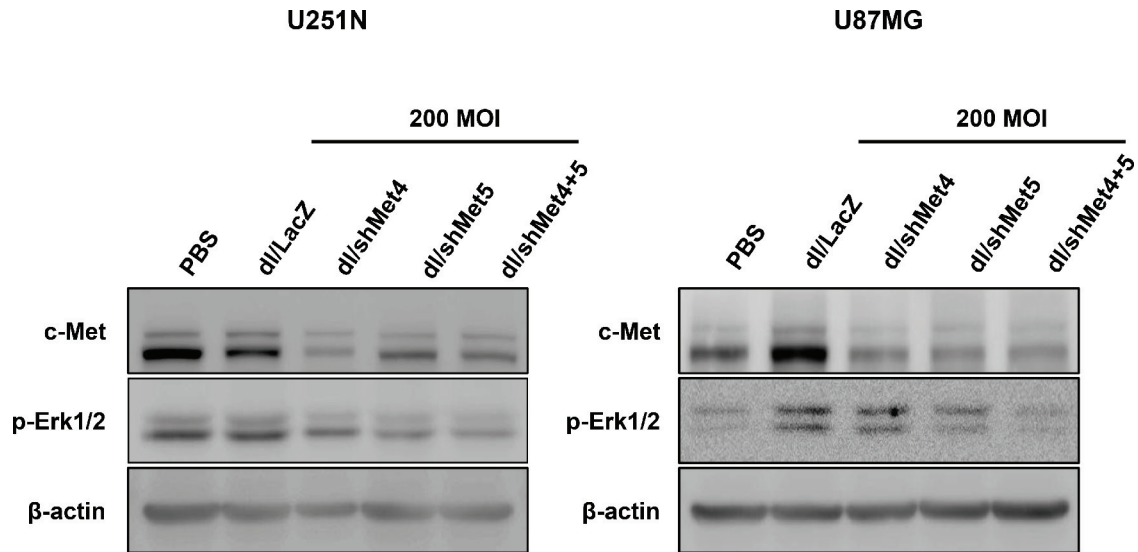

**Supplementary Figure S1: The expression of total c-Met and phospho-Erk1/2 in glioma cells transduced with c-Met-specific shRNA-expressing Ad.** Human glioma cancer cells (U251N and U87MG) were transduced with dl/LacZ, dl/shMet4, dl/shMet5, or dl/shMet4+5 at 200 MOI. After 72 hr, cell lysates were assessed for total c-Met and phospho-Erk1/2 by western blot analysis. Results are representative of three independent experiments.

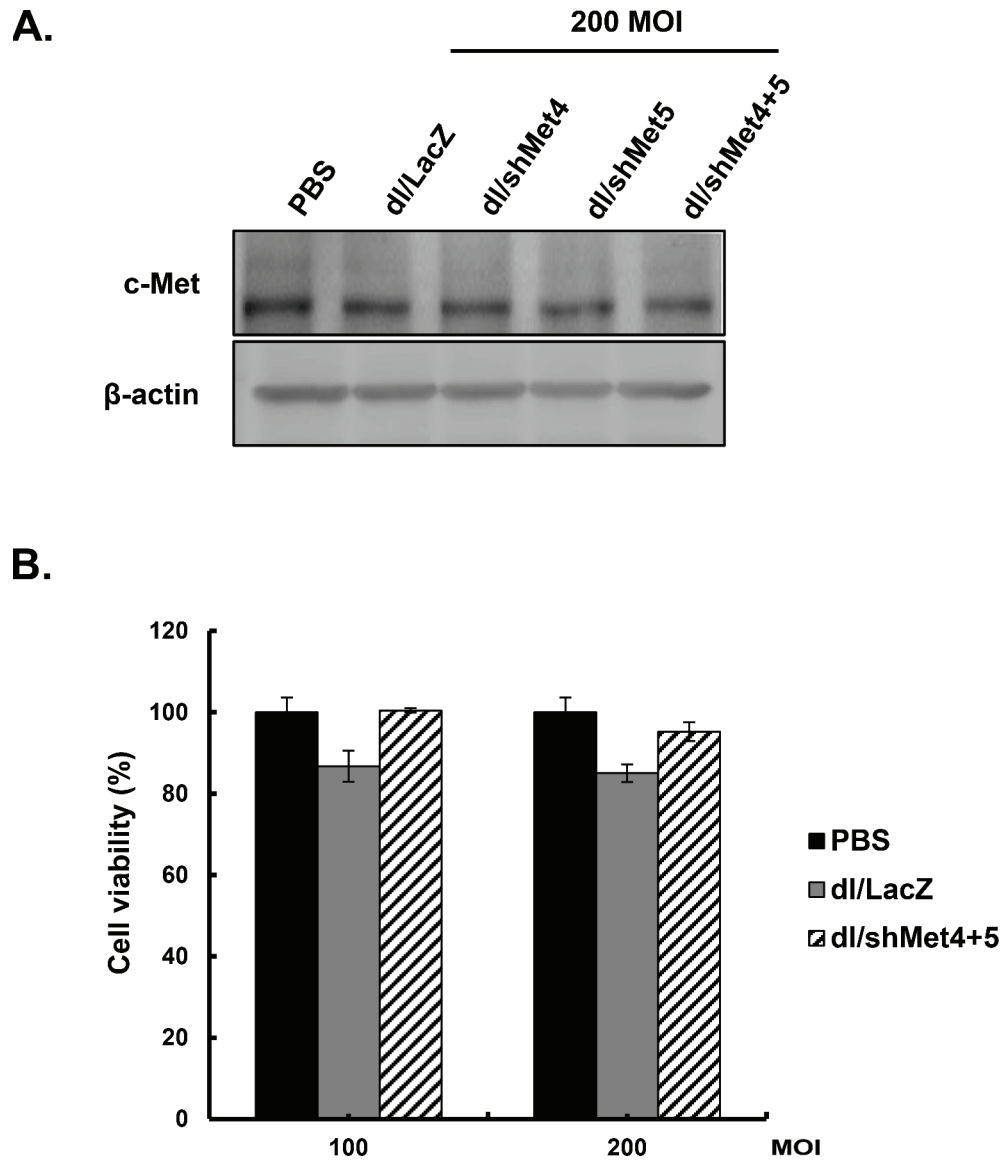

**Supplementary Figure S2: The c-Met expression and viability of normal cell transduced with c-Met-specific shRNA-expressing Ads.** (A) HDF cells were transduced with dl/LacZ, dl/shMet4, dl/shMet5, or dl/shMet4+5 at 200 MOI. After 72 hr, total c-Met and phospho-c-Met expression level was observed by western blot analysis. Results are representative of three independent experiments. (B) Effect of c-Met-specific shRNA-expressing Ad on the viability of human normal cells. HDF normal cells were transduced with dl/LacZ or dl/shMet4+5 at 100 or 200 MOI for 72 hr. Result are expressed as a percentage of control (PBS-treated cells).

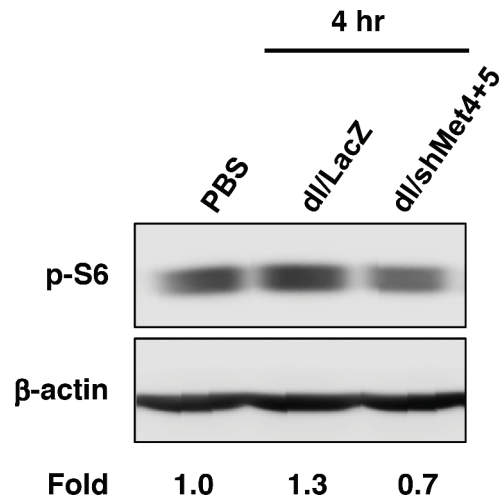

**Supplementary Figure S3: The expression level of phospho-S6.** U343 cells were transduced with dl/LacZ or dl/shMet4+5 at 100 MOI. After 4 hr, cells were analyzed with antibody against phospho-S6. Results are representative of three independent experiments.

**Supplementary Table 1: Primer information for cellular senescence gene**

| Gene            | Primer sequence                   | Product (bp) |
|-----------------|-----------------------------------|--------------|
| <b>SM22</b>     |                                   |              |
| Forward         | 5'-TGGCGTGATTCTGAGCAA-3'          | 534          |
| Reverse         | 5'-CTGCCAAGCTGCCAAGG-3'           |              |
| <b>TGase II</b> |                                   |              |
| Forward         | 5'-CTCGTGGAGCCAGTTATCAACAGCTAC-3' | 310          |
| Reverse         | 5'-TCTCGAAGTTCACCACCAGCTTGTG-3'   |              |
| <b>PAI-1</b>    |                                   |              |
| Forward         | 5'-GTGTTTCAGCAGGTGGCGC-3'         | 300          |
| Reverse         | 5'-CCGGAACAGCCTGAAGAAGTG-3'       |              |
| <b>β-actin</b>  |                                   |              |
| Forward         | 5'-CGTCTTCACCATGGAGA-3'           | 310          |
| Reverse         | 5'-CGGCCATCACGCCACAGTTT-3'        |              |

**Supplementary Table 2: Development of AVOs in PBS-, dl/lacZ-, or dl/shMet4+5-treated U343 cells.** Tumor cells were transduced with dl/lacZ or dl/shMet4+5 at an MOI of 30, 50, and 100 for 72 hr. Red fluorescence in acridine orange-stained cells was detected by FACS analysis.

|         | PBS         | dl/LacZ      | dl/shMet4+5  |
|---------|-------------|--------------|--------------|
| 30 MOI  | 7.22 ± 1.19 | 11.28 ± 0.71 | 18.97 ± 1.75 |
| 50 MOI  | 7.22 ± 1.19 | 11.08 ± 0.1  | 20.44 ± 0.62 |
| 100 MOI | 7.22 ± 1.19 | 14.47 ± 3.26 | 22.88 ± 2.29 |
